# Supplementary material
Source: PubMed Central journal article supplement (PMC7310603)
Supplement: NIHMS1549985-supplement-1.pdf [file NIHMS1549985-supplement-1.pdf]

### **Supplementary figure legends**

**Fig. S1.** Exosomes from FAK depleted human fibroblasts are deficient in promoting tumorigenic properties. **A.** Trans-well migration assays for MDA-MB-231 cells treated with PBS or exosomes from shCtrl or shFAK transduced WI-38 fibroblasts. **B.** EDU incorporation assays for MDA-MB-231 cells treated with PBS or exosomes from shCtrl or shFAK transduced WI-38 fibroblasts.

**Fig. S2.** Quantitative-PCR analysis of miR levels in exosomes from WI-38 fibroblasts transduced with shCtrl or shFAK and educated by MCF7 cells.

**Fig. S3. A.** Immuno-blots showing levels of Twist1, Ccne1 and GAPDH in PyMT cells treated with 4 µg of purified exosomes from Ctrl or cKO CAFs. **B.** Quantification of respective protein levels from purified exosomes normalized against GAPDH as described in A.

**Fig. S4. A.** Quantitative-PCR analysis of Ccne1 and Twist1 levels in PyMT cells treated with 4 µg of purified exosomes from Ctrl or cKO CAFs along with 100nM scramble or miR-148a inhibitor. **B.** Quantitative-PCR analysis of Wnt10b levels in PyMT cells treated with 4 µg of purified exosomes from Ctrl or cKO CAFs along with 100nM scramble or miR-16-1 inhibitor.

**Fig. S5. A.** Quantitative-PCR analysis of miR-16-1 and miR-148a levels in the exosomes from cKO CAF cells treated with 100nM scramble, miR-16-1 or miR-148a inhibitors. **B.** Trans-well migration assays for PyMT cells pre-treated with exosomes from cKO CAFs treated with 100nM scramble, miR-16-1 or miR-148a inhibitors.

**Fig. S6. A.** EdU incorporation assay for PyMT cells treated with 20 nM of scramble, miR-16-1 or miR-148a inhibitors. **B.** EdU incorporation assay for PyMT cells treated with 10 nM, 50 nM or 100 nM of miR-16-1 or miR-148a inhibitors.

**Fig. S7.** A working model on the inhibition of tumor cell functions and lung metastasis mediated by FAK-null CAF derived exosomes enriched with miR-16-1 and miR-148a.

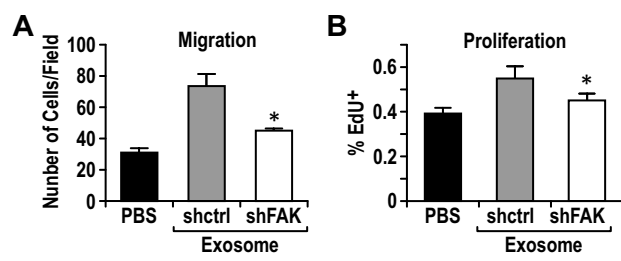

Figure S1

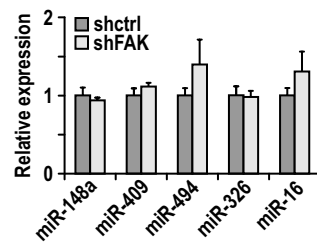

Figure S2

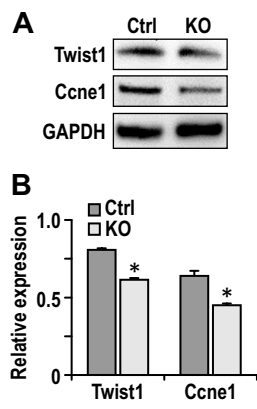

Figure S3

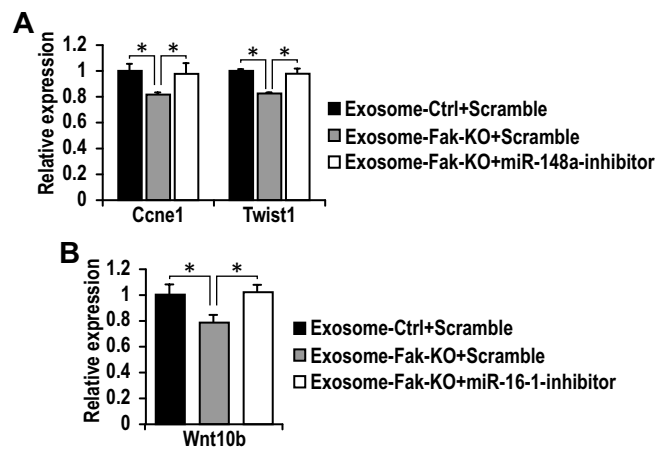

Figure S4

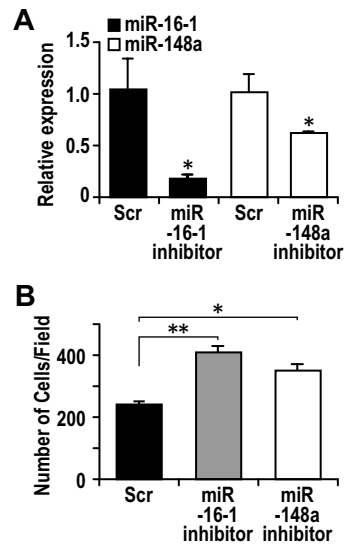

Figure S5

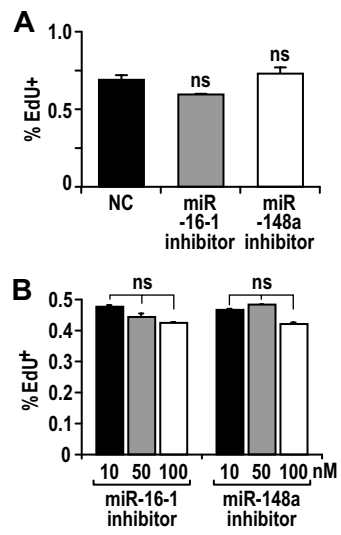

Figure S6



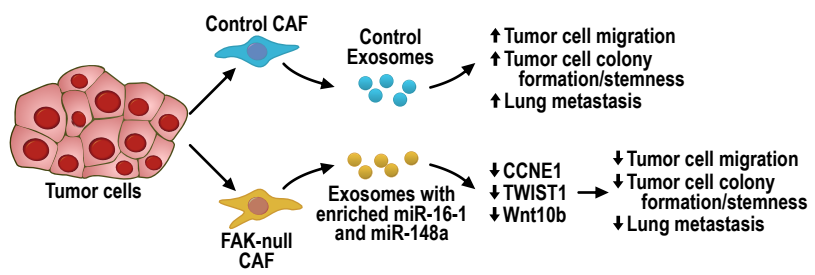

Figure S7
